# Supplementary material for: Development and function of smooth muscle cells is modulated by Hic1 in mouse testis
Source: Oxford University Press journal article supplement (doi:10.1242/dev.185884), 2020-01-01
Supplement: dev185884supp.pdf [file dev185884supp.pdf]

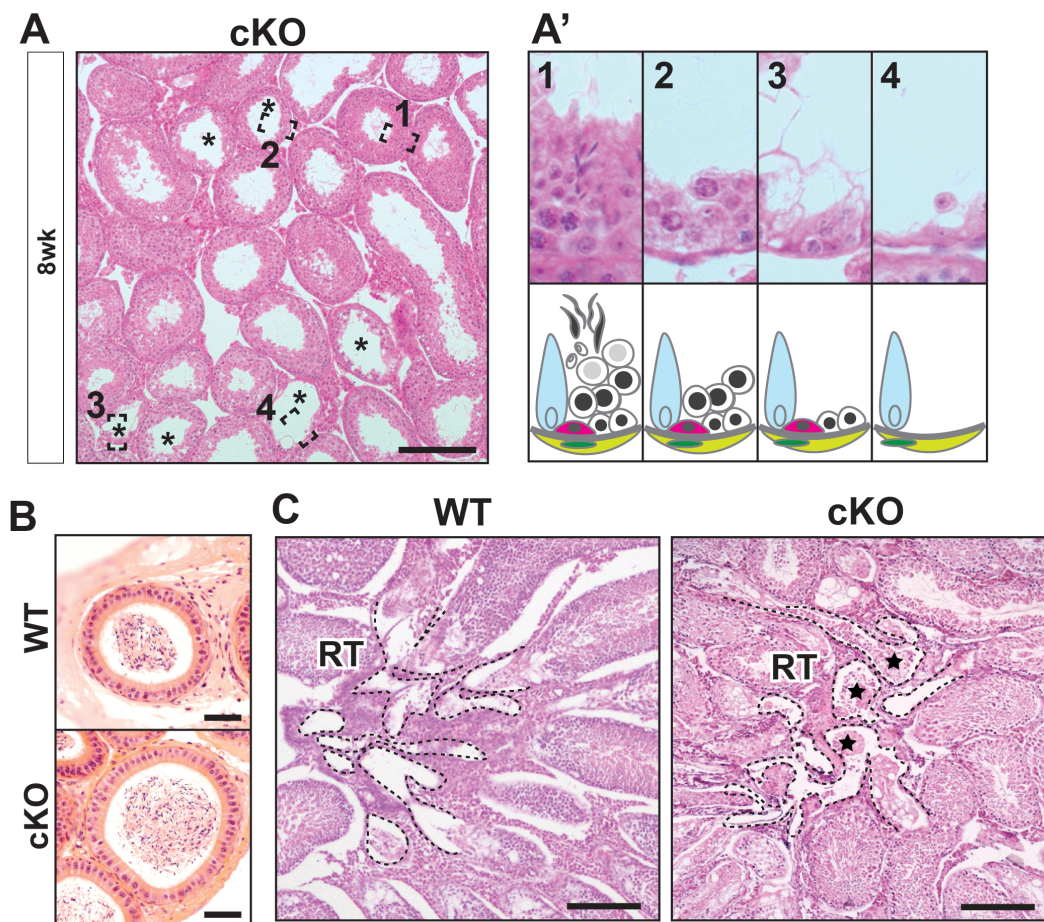

**Fig. S1 Degeneration and dilation of seminiferous tubules in cKO is independent from ER expression**

(A) Histology of the testis from 8wk-old cKO mouse. Right panels A'1–4 show the regions surrounded by broken rectangles 1–4 in the left panel at higher magnifications together with schematic illustrations below. \* indicates degenerative tubules in A. (B) Histology of the epididymis from adult WT and cKO mice. (C) Histology of the rete testis (RT, region outlined by broken line) in 8wk-old WT and cKO mouse. Stars represent the cell debris observed in the luminal region of RT in cKO testis. Bars, 50 $\mu$ m in B, 200 $\mu$ m in A and C.

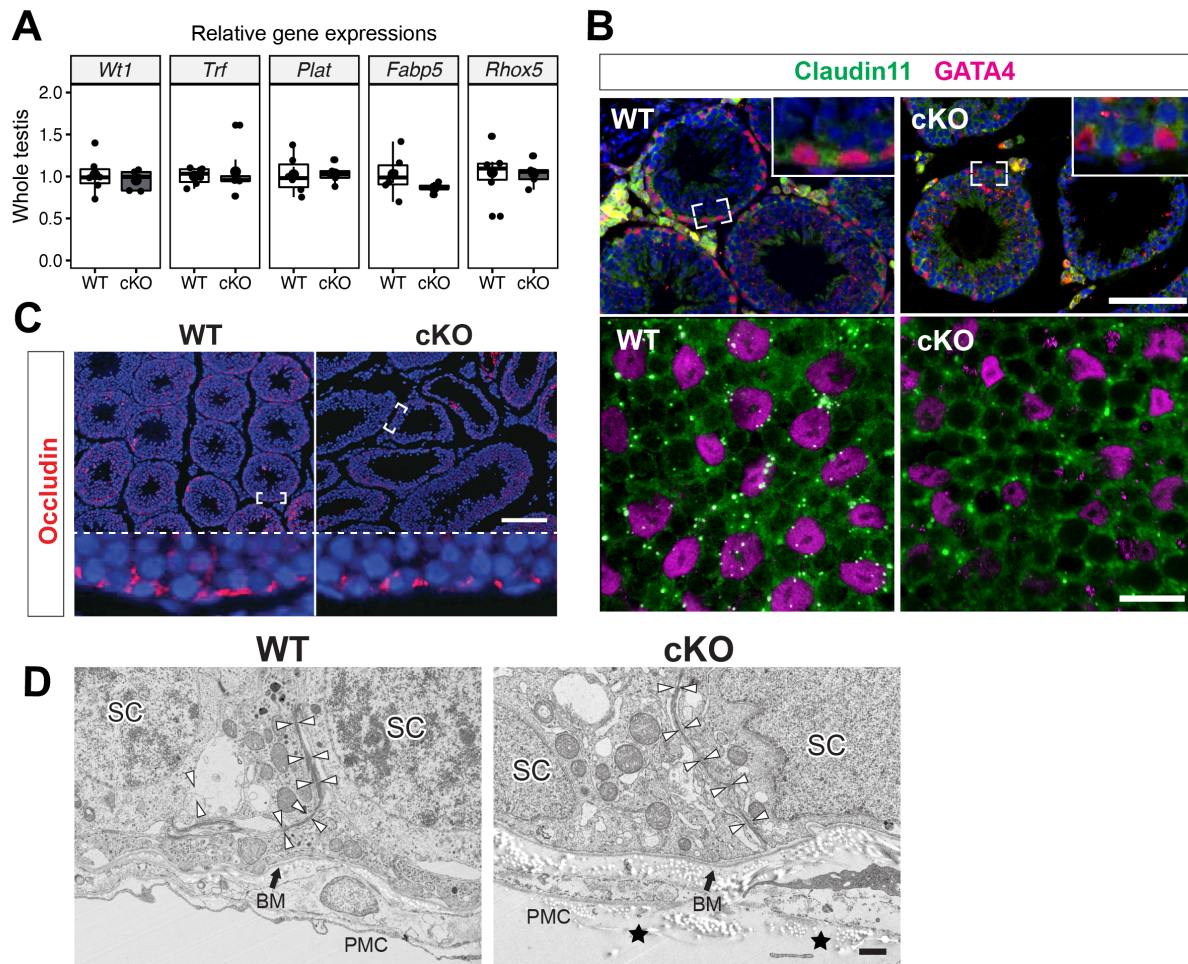

**Fig. S2 Sertoli cell function was not affected in cKO mice**

(A) Expression levels of genes related to Sertoli cell function in whole testis of 8wk-old WT and cKO mice (n=6 for WT, n=5 for cKO). (B–D) Blood-testis barrier (BTB) appeared to be unaffected in cKO mice. (B) Anti-Claudin 11 (green) and GATA4 (red) immunohistochemistry in testis section (upper panels) and whole-mount seminiferous tubules (lower panels) from WT and cKO mice at 8wk-old. Claudin 11 signals were observed around the GATA4-positive Sertoli cell nuclei. (C) Anti-Occludin (red) immunohistochemistry in testis section from WT and cKO mice at 8wk-old. Lower panels in C show the magnification of regions surrounded by broken rectangles. (D) Transmission electron micrographs of 8wk-old WT and cKO mouse testes, visualizing similar ultrastructure of tight junctions between Sertoli cells in WT and cKO testis. White arrowheads point to intact junctions between Sertoli cells. BM: basement membrane, SC: Sertoli cell. Stars indicate accumulated lipid-like structures around the basement membrane. Bars, 100μm in upper panels in B and C, 20μm in lower panels in B and 1μm in D.



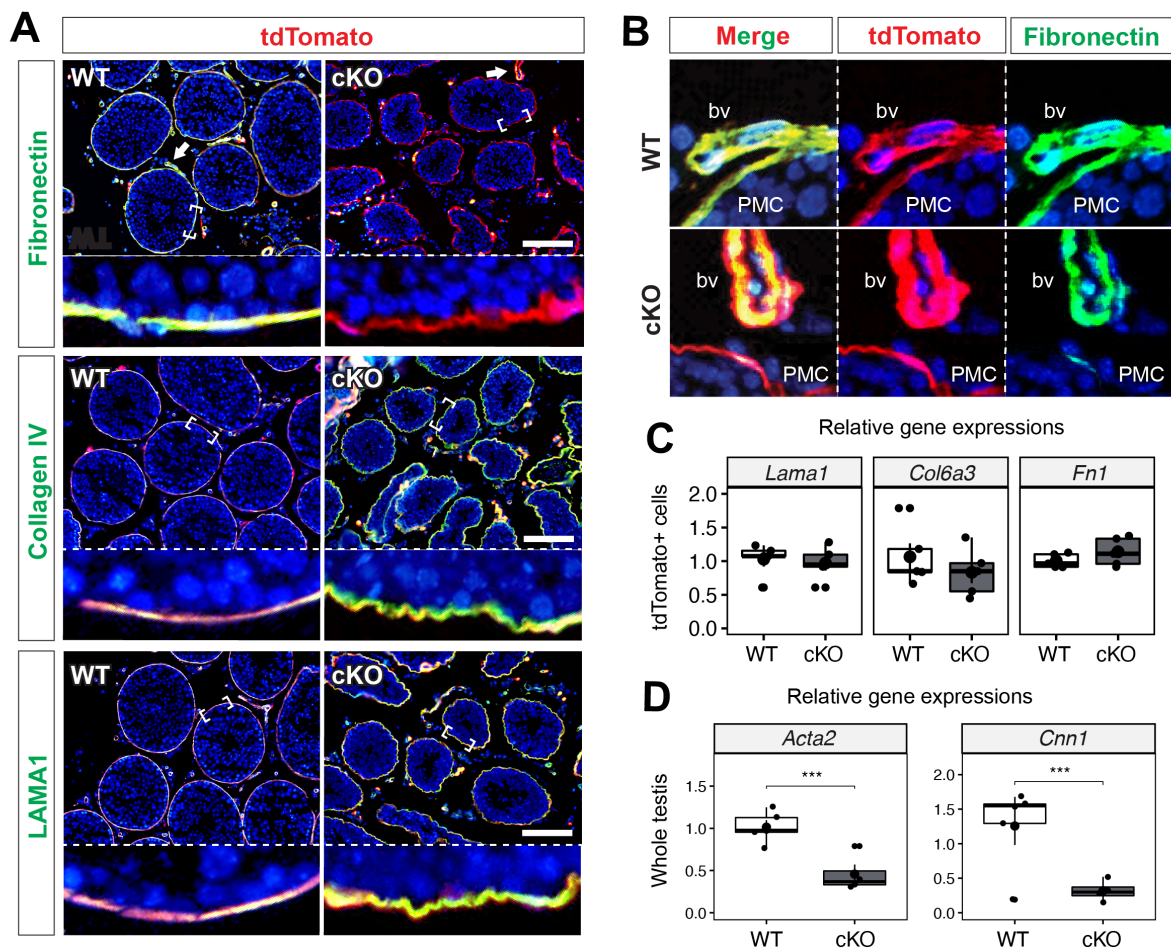

**Fig. S3 Fibronectin is present in vascular smooth muscle cells, but not in PMCs of cKO mice**

(A, B) Cryosections of 8wk-old WT and cKO mouse testes, showing the immunoreactivity of ECM proteins (green) and tdTomato signals (red). Lower panels in A show magnification of the region surrounded by broken rectangles in upper panels. Bars, 100µm. (B) Higher magnification of the region indicated with white arrow in the top panels in A. In cKO testes, fibronectin signals were observed intensely in vascular smooth muscle cells but not in PMCs. bv: blood vessel. (C) Expression levels of genes encoding ECM proteins in tdTomato<sup>+</sup> cells sorted from 8wk-old WT and cKO mice. (n=5 for each genotype). (D) Expression levels of genes encoding smooth muscle contractile proteins in whole testis from 8wk-old WT and cKO mice. (n=6 for WT, n=5 for cKO). \*\*\*p<0.005. Analysis was performed using student's t-test. Bars, 100µm.

**Supplementary Tables****Table S1. List of antibodies used in this study**

| Antigen        | Dilution              | Description       | Company        | CAT#           |
|----------------|-----------------------|-------------------|----------------|----------------|
| $\alpha$ SMA   | 1/500 IHC, 1/1,000 WB | Mouse monoclonal  | Sigma          | A5228          |
| c-KIT          | 1/200 IHC             | Goat polyclonal   | R&D systems    | AF1356         |
| Claudin 11     | 1/100 IHC             | Rabbit polyclonal | Thermo Fisher  | 36-4500        |
| CNN1           | 1/5000 WB             | Rabbit monoclonal | Abcam          | ab46794        |
| CNND1          | 1/400 IHC             | Rabbit monoclonal | Abcam          | ab16663        |
| Collagen IV    | 1/100 IHC             | Rabbit polyclonal | Abcam          | ab6586         |
| Fibronectin    | 1/100 IHC             | Rabbit polyclonal | Abcam          | ab2413         |
| GATA4          | 1/100 IHC             | Goat polyclonal   | Santa cruz     | sc1237         |
| GFR $\alpha$ 1 | 1/100 IHC             | Goat polyclonal   | R&D systems    | AF560          |
| HSP70          | 1/1000 IHC            | Rabbit polyclonal | Abcam          | ab79852        |
| HPRT1          | 1/20,000 WB           | Rabbit polyclonal | Thermo Fisher  | A305-306A      |
| Ki67           | 1/100 IHC             | Mouse monoclonal  | Leica          | NCL-L-Ki67-MM1 |
| Laminin        | 1/200 IHC             | Rabbit polyclonal | Abcam          | ab11575        |
| LIN28A         | 1/200 IHC             | Rabbit monoclonal | Cell Signaling | 8706           |
| PECAM-1        | 1/100 IHC             | Rat monoclonal    | BD Pharmingen  | 550274         |
| PLZF           | 1/100 IHC             | Rabbit polyclonal | Santa cruz     | sc22889        |
| RFP            | 1/200 IHC             | Rabbit polyclonal | MBL            | PM005          |
| SCP3           | 1/500 IHC             | Mouse monoclonal  | Santa cruz     | sc74569        |
| SOX9           | 1/100 IHC             | Rabbit polyclonal | Milipore       | AB5535         |
| VASA           | 1/1000 IHC            | Rabbit polyclonal | Abcam          | ab13840        |



**Table S2. List of primers used for qPCR**

| Target gene   | Direction | Sequence (5' → 3')       |
|---------------|-----------|--------------------------|
| <i>Acta2</i>  | F         | TGCTGTCCCTCTATGCCTCT     |
|               | R         | GAAGGAATAGCCACGCTCAG     |
| <i>Col6a3</i> | F         | GGAACCACGGAAGAGAGCAA     |
|               | R         | CAGGGAAGTGAACCAAGACA     |
| <i>Cnn1</i>   | F         | CAAGCTGGCCCAGAAATACGACC  |
|               | R         | TCTTCACAGAACCCGGCTGCAG   |
| <i>Esr1</i>   | F         | TTGAACCAGCAGGGTGGC       |
|               | R         | AGGCTTTGGTGTGAAGGGTC     |
| <i>Esr2</i>   | F         | GGCAAGCTCATCTTTGCTCC     |
|               | R         | CTCATCCCTTGGGACAGCAC     |
| <i>Fabp5</i>  | F         | CGGTCAAAACCGAGAGCACA     |
|               | R         | GTGCAGACCGTCTCAGTTTTTC   |
| <i>Fn1</i>    | F         | GCCACCATTACTGGTCTGGA     |
|               | R         | ACCAGTTGGGGAAGCTCATC     |
| <i>Hprt</i>   | F         | AGCAGTACAGCCCCAAAATGGT   |
|               | R         | CCAACAAAGTCTGGCCTGTATCC  |
| <i>Lama1</i>  | F         | TATCCTGCCCACATCAAACAG    |
|               | R         | CTTGTAAGTCAAAGGCTCGG     |
| <i>Plat</i>   | F         | AGATGAGCCAACGCAGACAA     |
|               | R         | CTTGGTTCGCTGCAACTTCG     |
| <i>Rhox5</i>  | F         | GCAGCGCACTAATTCCTTTG     |
|               | R         | GCAGCCCTCCTGATCTTAAA     |
| <i>Trf</i>    | F         | CGTAGGCGCATTCAAGTGTC     |
|               | R         | ATTGGTCCCTGTCAGCCTTC     |
| <i>Wtl</i>    | F         | CCAGTGTAATACTTGTCAGCGAAA |
|               | R         | ATGAGTCCTGGTGTGGGTCTTC   |

## Supplementary Movies

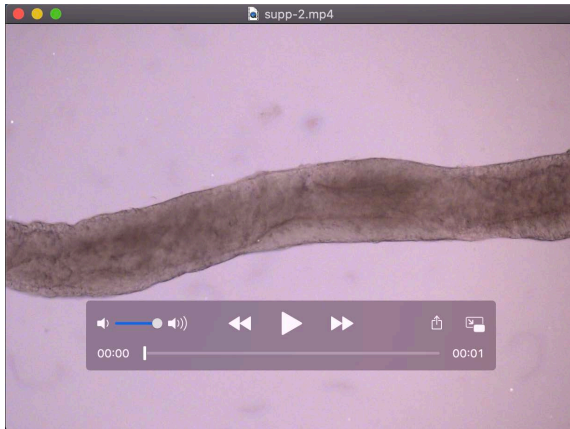

**Movie 1. Active contraction of adult WT seminiferous tubule**

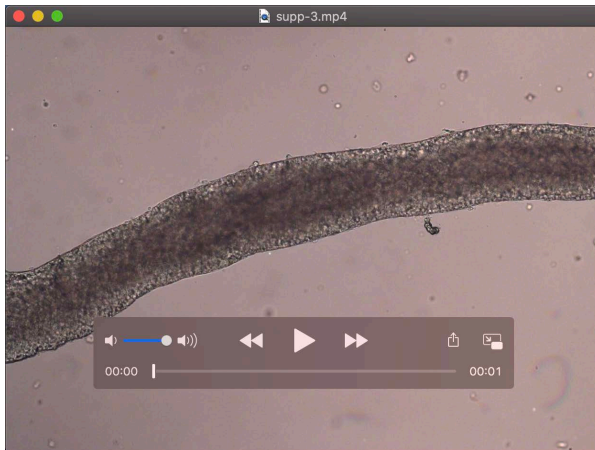

**Movie 2. Contraction of adult cKO seminiferous tubule**

## **Supplementary Materials and Methods**

### **Western blot**

Testes collected from 8wk-old WT and cKO mice were rinsed with PBS and homogenized in cold RIPA buffer containing protease inhibitor cocktail (Sigma). Protein concentration was determined by a DC protein assay (Bio-Rad). Equal amounts of total protein from each sample were then mixed with SDS loading buffer and boiled at 95°C for 10 minutes. The target proteins were separated by SDS-PAGE, then transferred onto PVDF membranes. The membranes were blocked with 5% BSA/TBST with 0.1% Tween 20, and then incubated with primary antibodies listed in Table 1 at 4°C overnight. The membranes were washed with 0.1% Tween 20/TBST and incubated with secondary antibodies for at least 1 hour at room temperature. All secondary antibodies were diluted into 5% non-fat milk in 1X TBST with 0.1% Tween 20. The membranes were washed with 0.1% Tween 20/TBST. ECL was carried out with Pierce™ ECL 2 Western Blotting Substrate (Thermo Fisher) and the signals were visualized with ChemiDoc™ XRS+ system (Bio-Rad). The expression of HPRT1 was used as an internal control in this experiment.

### **Efferent duct ligation**

Mice were anesthetized with isoflurane, and the efferent duct of a testis was ligated under a dissecting microscope as reported previously (Smith, 1962) with 7-0 nylon suture. Contralateral testis from the same animal was kept as a control without ligation. Mice were euthanized 1 week after the ligation, and their testes were collected, weighed, dispersed into seminiferous tubule fragments and analyzed by  $\alpha$ SMA immunohistochemistry in whole-mount preparation. Weight of the ligated testis was  $1.30 \pm 0.04$  times heavier than the control testis at 1 week after the ligation ( $p=0.034$ , student's t-test,  $n=3$ ). More than 30 whole-mount seminiferous tubules were analyzed per animal for the quantification of PMC number/half circumference of seminiferous tubules.
